# Supplementary material for: Repetitive Transcranial Magnetic Stimulation (rTMS) of Dorsolateral Prefrontal Cortex May Influence Semantic Fluency and Functional Connectivity in Fronto-Parietal Network in Mild Cognitive Impairment (MCI)
Source: MDPI journal article supplement (doi:10.3390/biomedicines10050994), 2022-04-25
Supplement: s1 [file s1]

**Supplementary Table S1.** Between-group comparison on comprehensive cognitive and behavioral measures at pre-treatment evaluation via Kruskal-Wallis test ( $H$ ) and Chi-Square test ( $\chi^2$ ); post-hoc analyses were executed by Mann-Whitney test.

| Variable                     | MCI-TMS ( <i>n</i> = 11) | MCI-C ( <i>n</i> = 16)  | HC ( <i>n</i> =13)      | <i>H</i> / $\chi^2$ | <i>p</i> -value | Adj- <i>p</i>    | Benjamini-Hochberg adjusted post-hoc analyses |                  |                  |
|------------------------------|--------------------------|-------------------------|-------------------------|---------------------|-----------------|------------------|-----------------------------------------------|------------------|------------------|
|                              |                          |                         |                         |                     |                 |                  | MCI-TMS                                       | MCI-TMS          | MCI-C            |
|                              |                          |                         |                         |                     |                 |                  | vs<br>MCI-C                                   | vs<br>HC         | vs<br>HC         |
| <i>Cognitive assessment:</i> |                          |                         |                         |                     |                 |                  |                                               |                  |                  |
| <i>RBANS subtests:</i>       |                          |                         |                         |                     |                 |                  |                                               |                  |                  |
| List Learning                | 21.00<br>(16.00, 24.00)  | 17.50<br>(15.25, 21.50) | 26.00<br>(23.00, 28.50) | 15.01               | 0.001           | <b>0.001</b>     | 0.250                                         | <b>0.010</b>     | <b>&lt;0.001</b> |
| Story Memory-IR              | 15.00<br>(14.00, 17.00)  | 13.00<br>(9.25, 14.50)  | 20.00<br>(18.00, 22.50) | 20.61               | <0.001          | <b>&lt;0.001</b> | 0.050                                         | <b>&lt;0.001</b> | <b>&lt;0.001</b> |
| Figure Copy                  | 15.00<br>(12.00, 17.00)  | 12.00<br>(10.25, 13.75) | 15.00<br>(12.50, 16.00) | 6.48                | 0.039           | 0.053            | -                                             | -                | -                |
| Line Orientation             | 14.00<br>(11.00, 17.00)  | 14.00<br>(11.25, 16.50) | 17.00<br>(14.50, 18.50) | 4.13                | 0.126           | 0.135            | -                                             | -                | -                |
| Picture Naming               | 10.00<br>(10.00, 10.00)  | 9.00<br>(9.00, 10.00)   | 10.00<br>(10.00, 10.00) | 12.03               | 0.002           | 0.135            | -                                             | -                | -                |
| Semantic Fluency             | 13.00<br>(10.00, 15.00)  | 15.00<br>(13.25, 17.00) | 19.00<br>(16.50, 21.00) | 16.96               | <0.001          | <b>&lt;0.001</b> | <b>0.044</b>                                  | <b>&lt;0.001</b> | <b>0.001</b>     |
| Digit Span                   | 6.00<br>(6.00, 8.00)     | 8.00<br>(6.00, 9.75)    | 9.00<br>(8.00, 11.50)   | 6.70                | 0.035           | 0.052            | -                                             | -                | -                |
| Coding                       | 25.00<br>(16.00, 33.00)  | 20.00<br>(14.75, 29.75) | 39.00<br>(30.50, 45.50) | 13.00               | 0.001           | <b>0.003</b>     | 0.543                                         | <b>0.010</b>     | <b>&lt;0.001</b> |
| List Recall                  | 1.00<br>(0.00, 3.00)     | 0.50<br>(0.00, 1.00)    | 4.00<br>(2.50, 6.50)    | 12.76               | 0.002           | <b>0.003</b>     | 0.511                                         | <b>0.032</b>     | <b>&lt;0.001</b> |
| List Recognition             | 13.00<br>(13.00, 18.00)  | 16.00<br>(15.00, 16.75) | 18.00<br>(17.50, 20.00) | 17.07               | <0.001          | <b>&lt;0.001</b> | 0.250                                         | <b>0.002</b>     | <b>&lt;0.001</b> |
| Story Recall-DR              | 1.00<br>(0.00, 7.00)     | 5.00<br>(3.25, 7.00)    | 10.00<br>(9.00, 11.50)  | 22.69               | <0.001          | <b>&lt;0.001</b> | 0.317                                         | <b>&lt;0.001</b> | <b>&lt;0.001</b> |
| Figure Recall                | 3.00<br>(0.00, 7.00)     | 3.50<br>(2.00, 5.00)    | 10.00<br>(7.50, 11.50)  | 15.75               | <0.001          | <b>0.001</b>     | 0.511                                         | <b>0.002</b>     | <b>&lt;0.001</b> |

*To be continued*

**Supplementary Table S1.** Continued.

| Variable                     | MCI-TMS ( <i>n</i> =<br>11) | MCI ( <i>n</i> = 16)    | HC ( <i>n</i> =13)      | <i>H</i> / $\chi^2$ | <i>p</i> -value | Adj- <i>p</i> | Benjamini-Hochberg adjusted post-hoc analyses |              |          |
|------------------------------|-----------------------------|-------------------------|-------------------------|---------------------|-----------------|---------------|-----------------------------------------------|--------------|----------|
|                              |                             |                         |                         |                     |                 |               | MCI-TMS                                       | MCI-TMS      | MCI      |
|                              |                             |                         |                         |                     |                 |               | vs<br>MCI                                     | vs<br>HC     | vs<br>HC |
| <i>Behavioural measures:</i> |                             |                         |                         |                     |                 |               |                                               |              |          |
| Beck Depression Inventory-II | 15.00<br>(3.00, 21.00)      | 12.00<br>(6.50, 16.50)  | 6.00<br>(2.00, 9.50)    | 5.14                | 0.077           | 0.095         | -                                             | -            | -        |
| Beck Anxiety Inventory       | 3.00<br>(2.00, 10.00)       | 6.50<br>(2.75, 13.75)   | 6.00<br>(2.50, 6.50)    | 0.78                | 0.675           | 0.675         | -                                             | -            | -        |
| Apathy Evaluation Scale      | 38.00<br>(33.00, 42.00)     | 35.50<br>(28.50, 40.00) | 31.00<br>(24.50, 32.50) | 8.61                | 0.013           | <b>0.022</b>  | 0.394                                         | <b>0.009</b> | 0.060    |

Note. MCI-TMS, patient with Mild Cognitive Impairment and underwent to TMS; MCI-C, patients with Mild Cognitive Impairment and not underwent to TMS; HC, healthy controls; Adj-*p* represents *p*-value corrected for multiple comparisons using Benjamini–Hochberg procedure; statistically significant differences are shown in **bold**.

**Supplementary Table S2.** Between-group comparison on comprehensive cognitive and behavioral measures at post-treatment evaluation (using pre-treatment scores as covariates) via Quade's rank analysis.

| Variable                     | MCI-TMS (n=11)          | MCI (n= 12)             | HC (n=12)               | Quade's test | p-value | Adj-p        | Benjamini-Hochberg adjusted post-hoc analyses |         |              |
|------------------------------|-------------------------|-------------------------|-------------------------|--------------|---------|--------------|-----------------------------------------------|---------|--------------|
|                              |                         |                         |                         |              |         |              | MCI-TMS                                       | MCI-TMS | MCI          |
|                              |                         |                         |                         |              |         |              | vs MCI                                        | vs HC   | vs HC        |
| <i>Cognitive assessment:</i> |                         |                         |                         |              |         |              |                                               |         |              |
| <i>RBANS subtests:</i>       |                         |                         |                         |              |         |              |                                               |         |              |
| List Learning                | 22.00<br>(19.00, 28.00) | 20.00<br>(17.25, 22.25) | 25.00<br>(22.00, 28.50) | 0.06         | 0.935   | 0.957        | -                                             | -       | -            |
| Story Memory-IR              | 14.00<br>(9.00, 17.00)  | 11.00<br>(9.25, 14.50)  | 17.00<br>(15.00, 19.50) | 0.20         | 0.814   | 0.957        | -                                             | -       | -            |
| Figure Copy                  | 14.00<br>(10.00, 16.00) | 11.00<br>(10.00, 12.00) | 14.00<br>(13.00, 16.00) | 1.60         | 0.214   | 0.459        | -                                             | -       | -            |
| Line Orientation             | 15.00<br>(14.00, 16.00) | 12.00<br>(10.00, 14.00) | 18.00<br>(14.50, 20.00) | 7.27         | 0.002   | <b>0.031</b> | <b>0.014</b>                                  | 0.521   | <b>0.002</b> |
| Picture Naming               | 10.00<br>(9.00, 10.00)  | 9.00<br>(9.00, 10.00)   | 10.00<br>(10.00, 10.00) | 3.87         | 0.030   | 0.148        | -                                             | -       | -            |
| Semantic Fluency             | 10.00<br>(6.00, 13.00)  | 8.00<br>(6.25, 8.75)    | 13.00<br>(10.50, 15.50) | 6.35         | 0.004   | <b>0.031</b> | <b>0.026</b>                                  | 0.487   | <b>0.005</b> |
| Digit Span                   | 8.00<br>(6.00, 10.00)   | 8.00<br>(6.00, 9.75)    | 9.00<br>(7.50, 11.50)   | 0.22         | 0.800   | 0.957        | -                                             | -       | -            |
| Coding                       | 28.00<br>(16.00, 35.00) | 27.00<br>(16.00, 31.00) | 42.00<br>(31.00, 47.50) | 0.30         | 0.737   | 0.957        | -                                             | -       | -            |
| List Recall                  | 0.00<br>(0.00, 3.00)    | 2.00<br>(0.00, 3.00)    | 5.00<br>(2.00, 5.00)    | 1.63         | 0.209   | 0.459        | -                                             | -       | -            |
| List Recognition             | 16.00<br>(13.00, 17.00) | 16.00<br>(14.25, 17.75) | 18.00<br>(16.00, 19.00) | 0.11         | 0.890   | 0.957        | -                                             | -       | -            |
| Story Recall-DR              | 3.00<br>(0.00, 7.00)    | 5.00<br>(5.00, 6.00)    | 8.00<br>(7.50, 10.50)   | 1.23         | 0.302   | 0.567        | -                                             | -       | -            |
| Figure Recall                | 1.00<br>(0.00, 10.00)   | 6.00<br>(4.00, 9.00)    | 9.00<br>(6.50, 12.00)   | 2.69         | 0.081   | 0.243        | -                                             | -       | -            |

*To be continued*

**Supplementary Table S2.** Continued.

| Variable                     | MCI-TMS ( <i>n</i> =<br>11) | MCI ( <i>n</i> = 12)    | HC ( <i>n</i> =12)      | Quade's test | <i>p</i> -value | Adj- <i>p</i> | Benjamini-Hochberg adjusted post-hoc analyses |          |          |
|------------------------------|-----------------------------|-------------------------|-------------------------|--------------|-----------------|---------------|-----------------------------------------------|----------|----------|
|                              |                             |                         |                         |              |                 |               | MCI-TMS                                       | MCI-TMS  | MCI      |
|                              |                             |                         |                         |              |                 |               | vs<br>MCI                                     | vs<br>HC | vs<br>HC |
| <i>Behavioural measures:</i> |                             |                         |                         |              |                 |               |                                               |          |          |
| Beck Depression Inventory-II | 10.00<br>(4.00, 15.00)      | 9.00<br>(8.00, 16.25)   | 4.50<br>(3.00, 9.25)    | 0.40         | 0.669           | 0.957         | -                                             | -        | -        |
| Beck Anxiety Inventory       | 3.00<br>(2.00, 25.00)       | 3.50<br>(3.00, 12.75)   | 3.50<br>(2.00, 9.25)    | 0.04         | 0.957           | 0.957         | -                                             | -        | -        |
| Apathy Evaluation Scale      | 37.00<br>(35.00, 39.00)     | 35.00<br>(29.50, 39.50) | 28.00<br>(24.00, 31.50) | 3.09         | 0.057           | 0.213         | -                                             | -        | -        |

Note. MCI-TMS, patient with Mild Cognitive Impairment and underwent to TMS; MCI, patients with Mild Cognitive Impairment and not underwent to TMS; HC, healthy controls; Adj-*p* represents *p*-value corrected for multiple comparisons using Benjamini–Hochberg procedure; statistically significant differences are shown in **bold**.
